# Supplementary material for: DA7R: A 7-Letter Zip Code to Target PDAC
Source: MDPI journal article supplement (doi:10.3390/pharmaceutics15051508), 2023-05-16

## DA7R: A 7-Letter Zip Code to Target PDAC

Sofia Parrasia<sup>1</sup>, Andrea Rossa<sup>2</sup>, Nicola Roncaglia<sup>2,3</sup>, Andrea Mattarei<sup>4</sup>, Claudia Honisch<sup>3</sup>, Ildikò Szabò<sup>1</sup>, Paolo Ruzza<sup>3\*</sup> and Lucia Biasutto<sup>5\*</sup>

<sup>1</sup> Department of Biology, University of Padova, Viale G. Colombo 3, 35131 Padova, Italy;

<sup>2</sup> Department of Chemical Sciences, University of Padova, Via F. Marzolo 1, 35131 Padova, Italy;

<sup>3</sup> CNR Institute of Biomolecular Chemistry, Padua Unit, Via F. Marzolo 1, 35131 Padova, Italy;

<sup>4</sup> Department of Pharmaceutical and Pharmacological Sciences, University of Padova, Via F. Marzolo 5, 35131 Padova, Italy;

<sup>5</sup> CNR Neuroscience Institute, Padua Unit, Viale G. Colombo 3, 35131 Padova, Italy.

\*Correspondence: [paolo.ruzza@cnr.it](mailto:paolo.ruzza@cnr.it); [lucia.biasutto@cnr.it](mailto:lucia.biasutto@cnr.it)

## SUPPLEMENTARY DATA

**Supplementary figure S1.** ESI-MS spectra (positive ion mode) of PAPTPL-Teg-N<sub>3</sub>, FITC-DA7R, PAPTPL-I-DA7R, PAPTPL-Teg-DA7R and PAPTPL-Teg-ca7R.

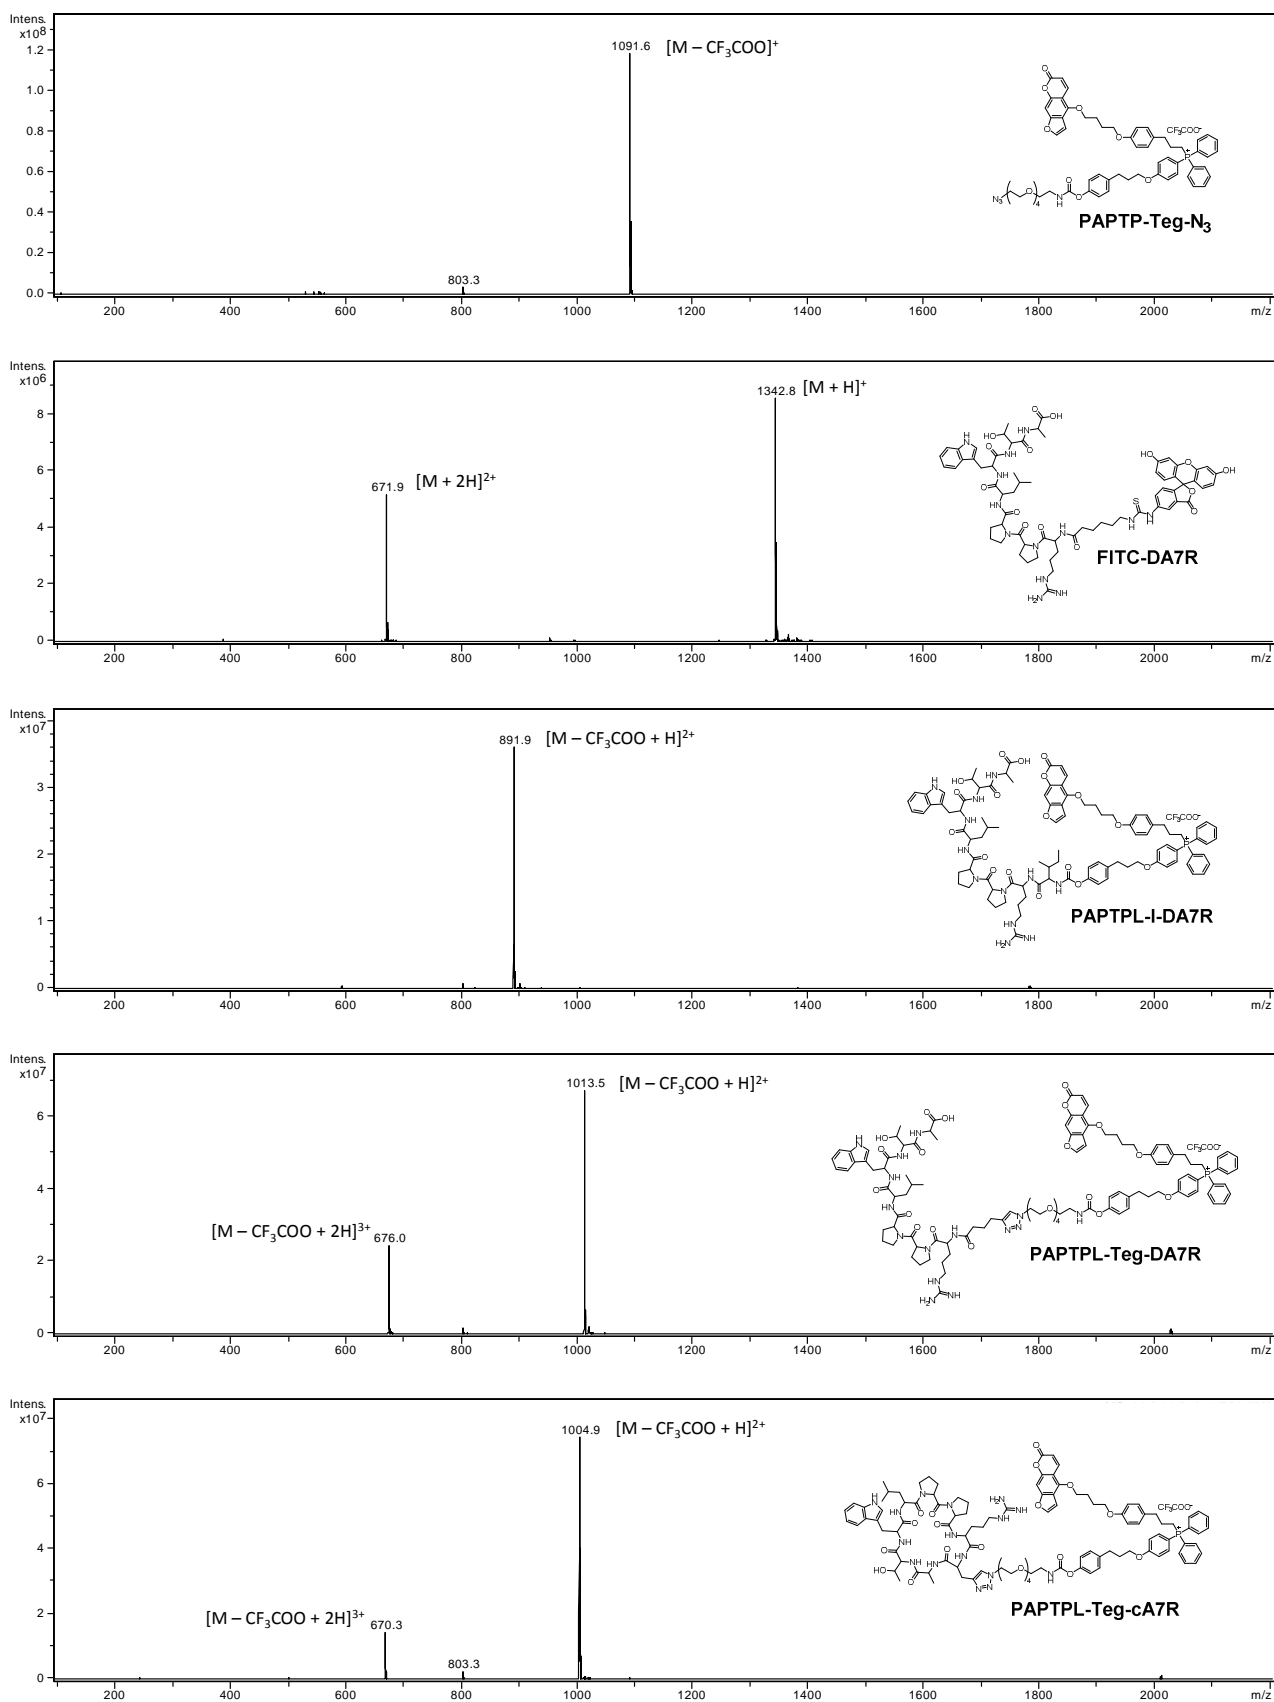

**Supplementary figure S2.** <sup>1</sup>H-NMR spectrum of 4-nitrophenyl (14-azido-3,6,9,12-tetraoxatetradecyl)carbamate (**1**).

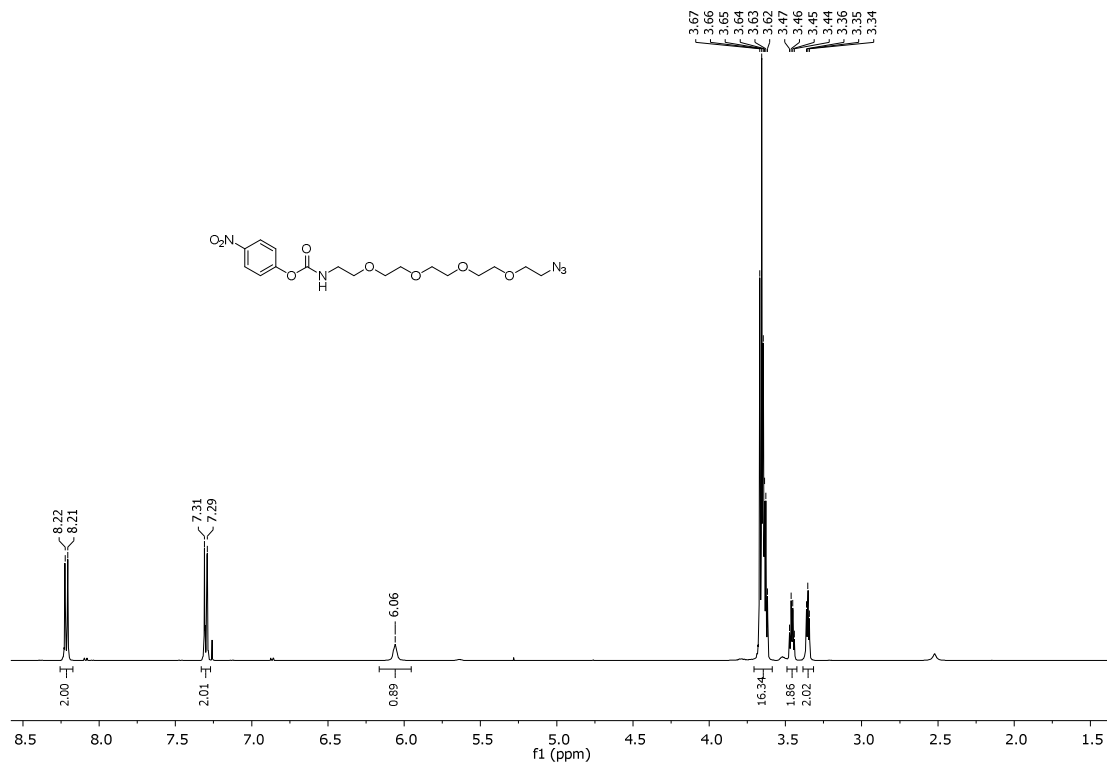

**Supplementary figure S3.** <sup>13</sup>C-NMR spectrum of 4-nitrophenyl (14-azido-3,6,9,12-tetraoxatetradecyl)carbamate (**1**).

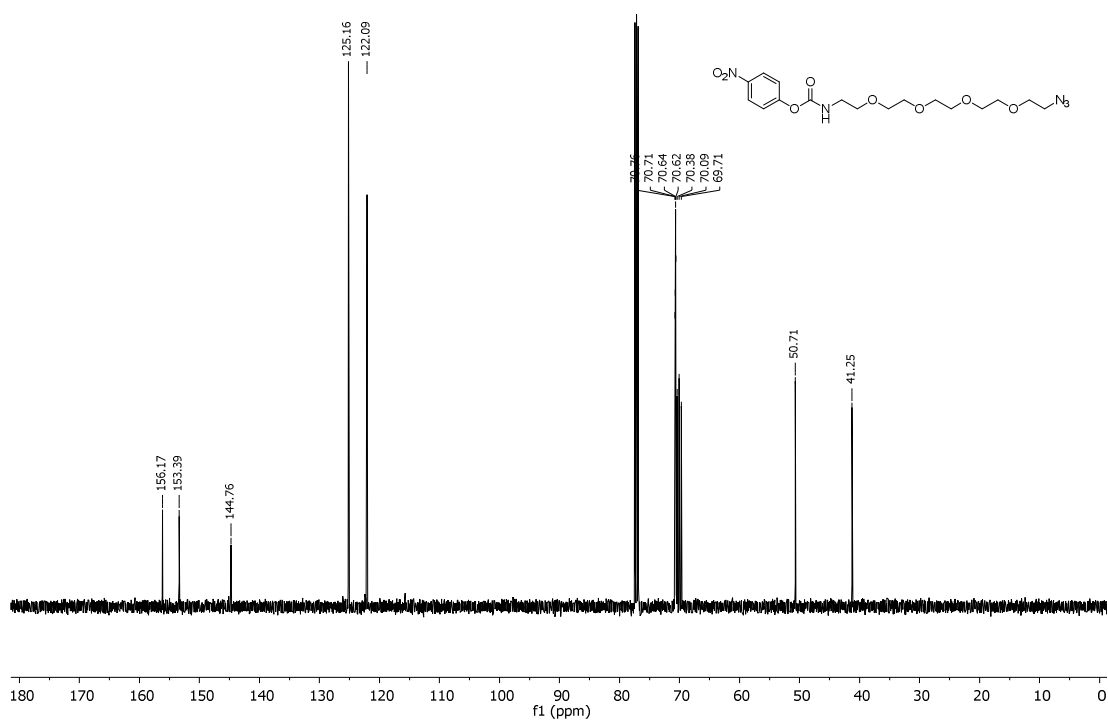

**Supplementary figure S4.**  $^1\text{H}$ -NMR spectrum of PAPTPL-Teg- $\text{N}_3$ .

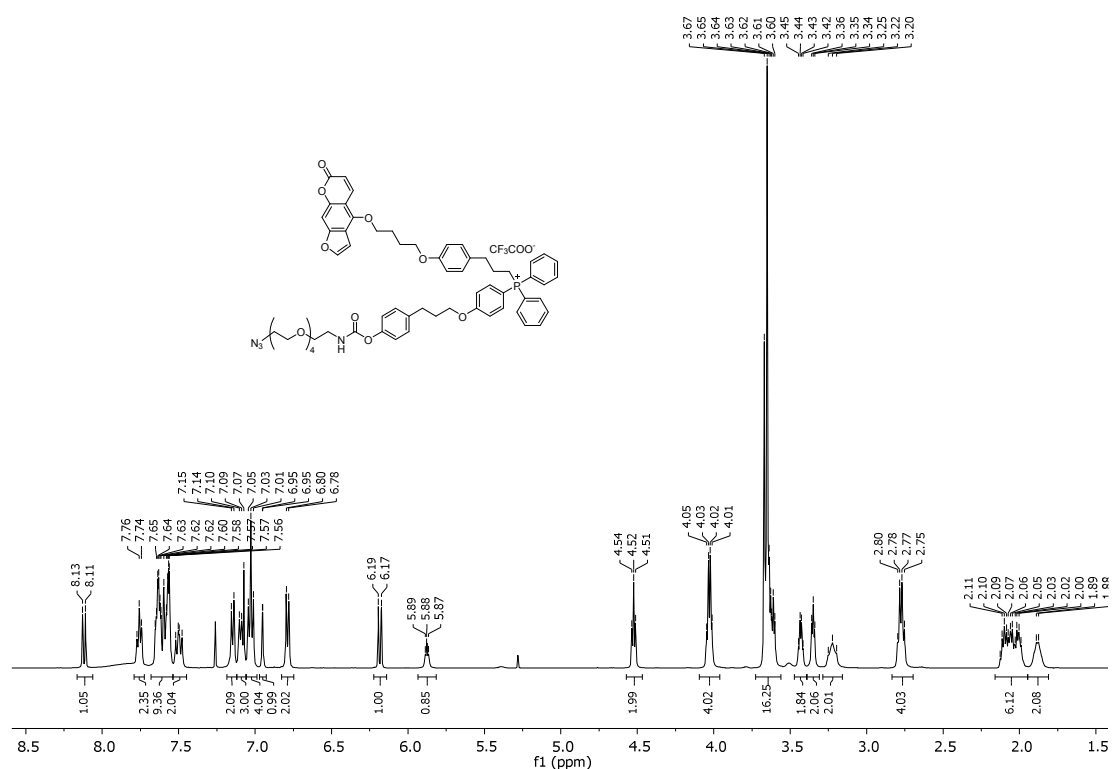

**Supplementary figure S5.**  $^{13}\text{C}$ -NMR spectrum of PAPTPL-Teg- $\text{N}_3$ .

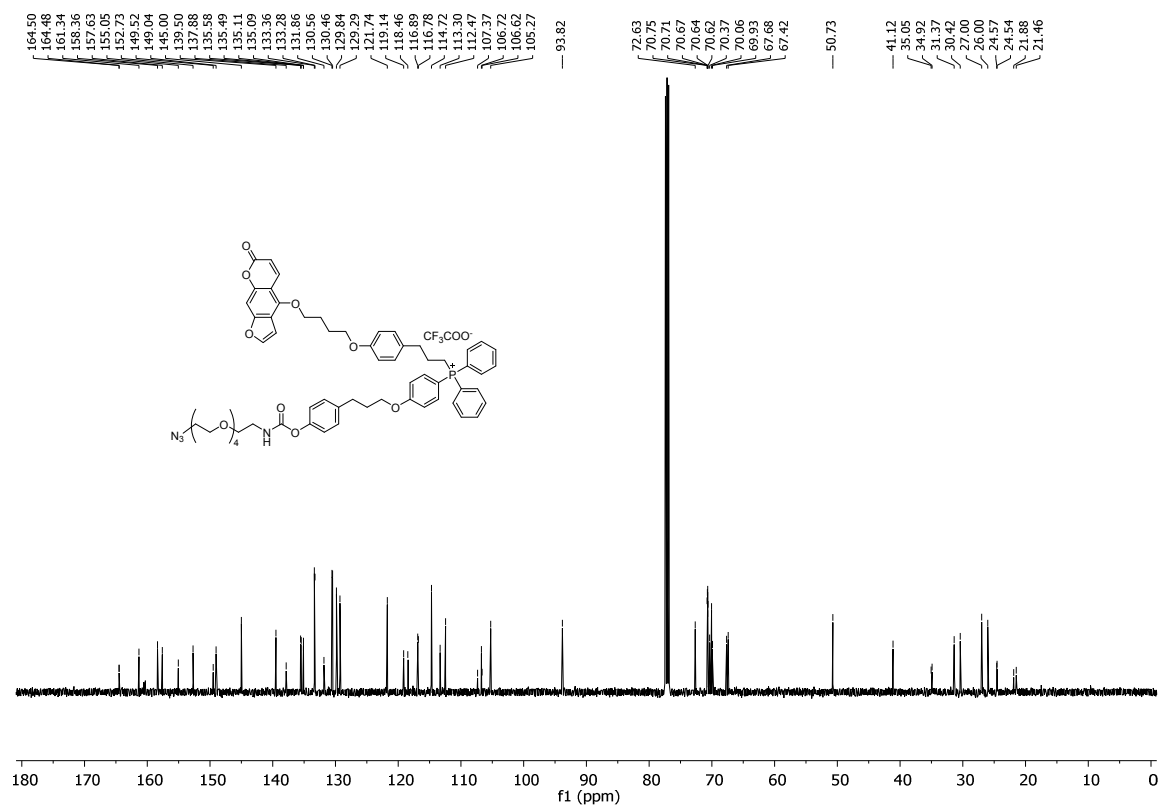

**Supplementary figure S6.** HPLC/UV chromatograms (312 nm) of PAPTPL-I-DA7R (A), PAPTPL-Teg-DA7R (B) and PAPTPL-Teg-cA7R (C).

**A**

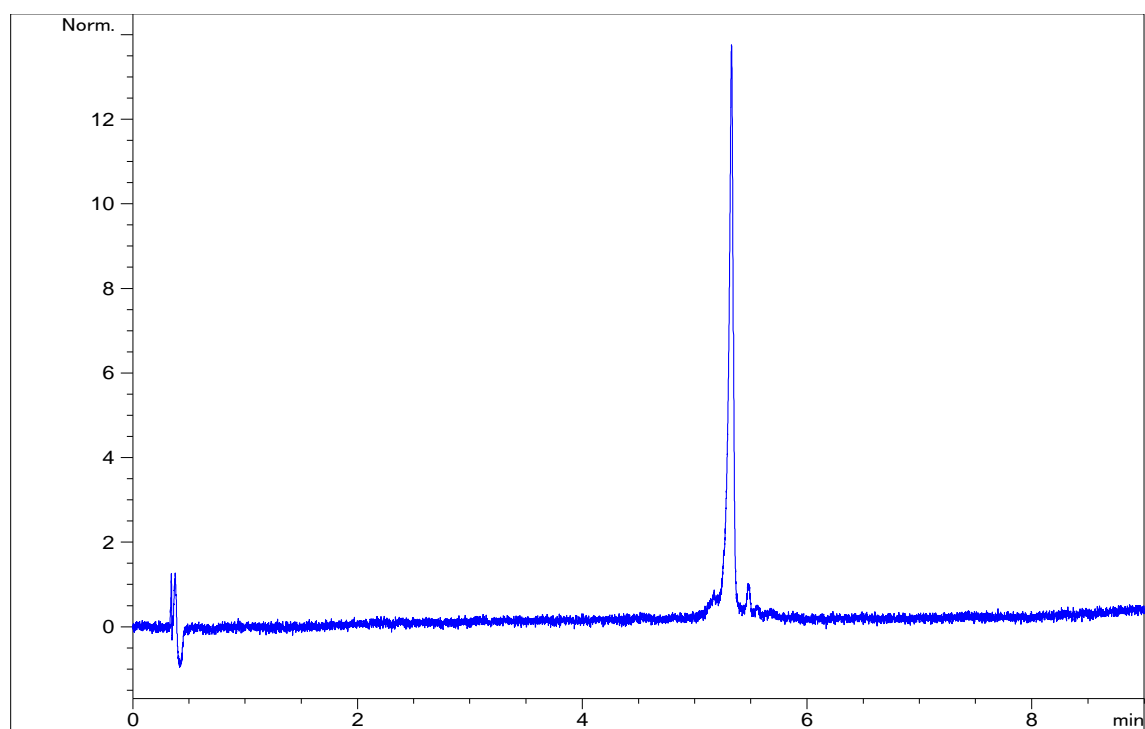

**B**

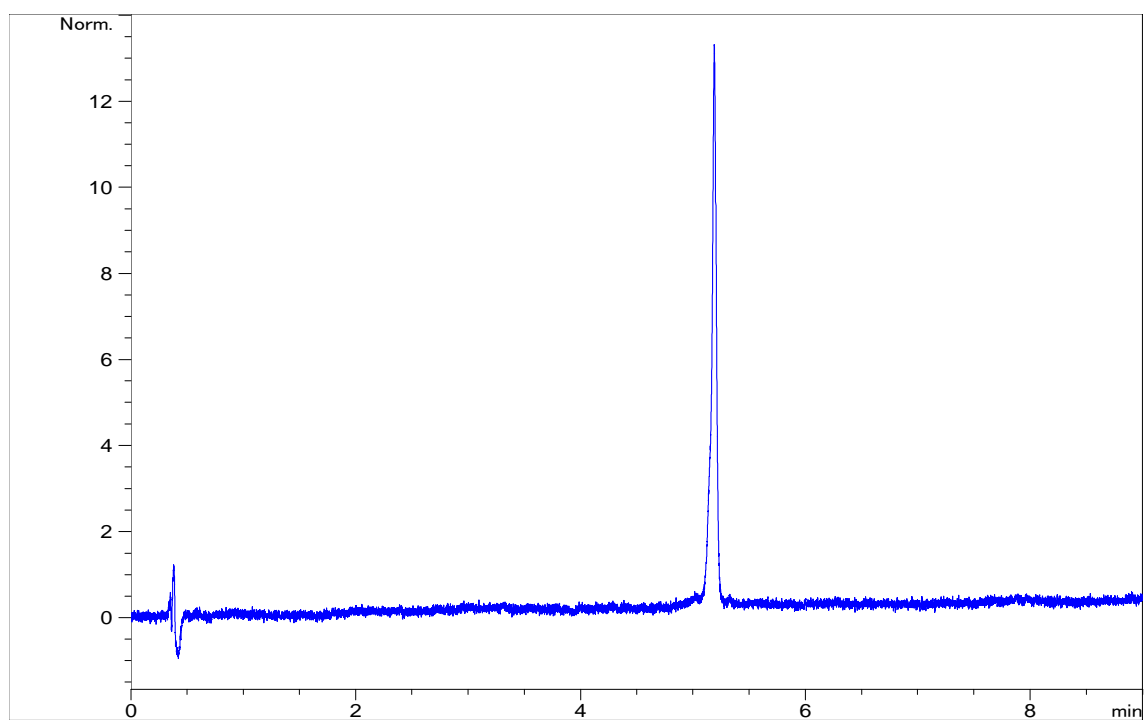

C

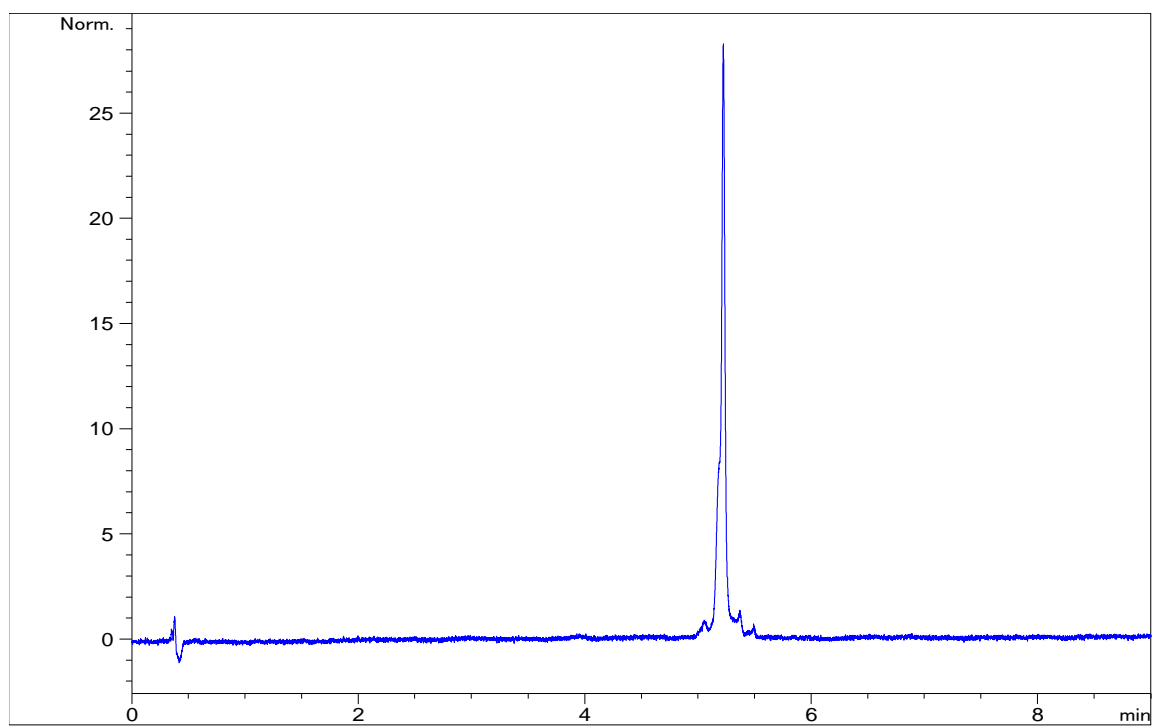

**Supplementary Figure S7.** Representative Western Blot image of total protein levels (Ponceau staining) in lysates from different PDAC cells lines. Each lane was loaded with 30  $\mu$ g of proteins.

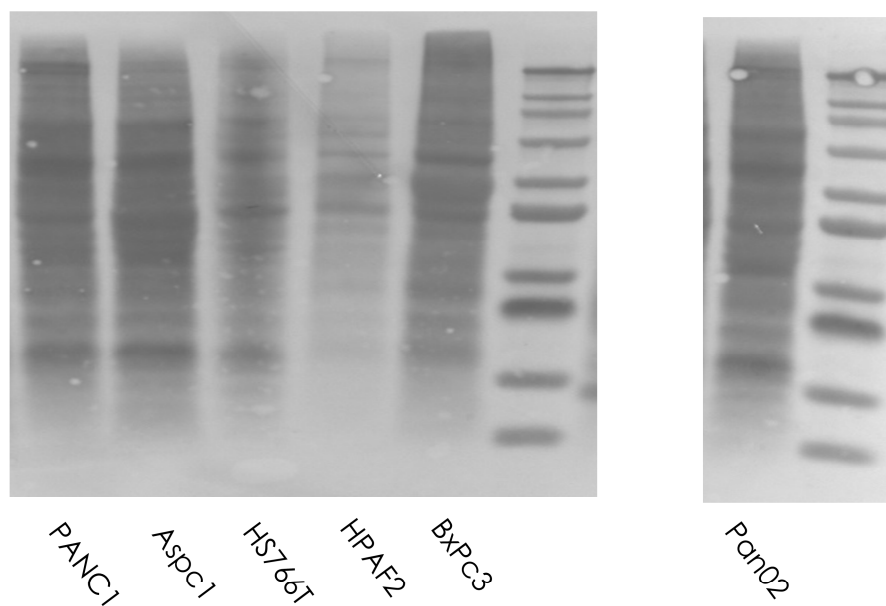

Supplement: s1 [file s1]
